# Supplementary material
Source: publisher figshare collection journal article supplement (https://frontiersin.figshare.com/ndownloader/files/24688235)

## *Supplementary Material*

**Supplementary Figure 1.** Micrograph of the overall microbial community of the ingestate obtained by DAPI staining

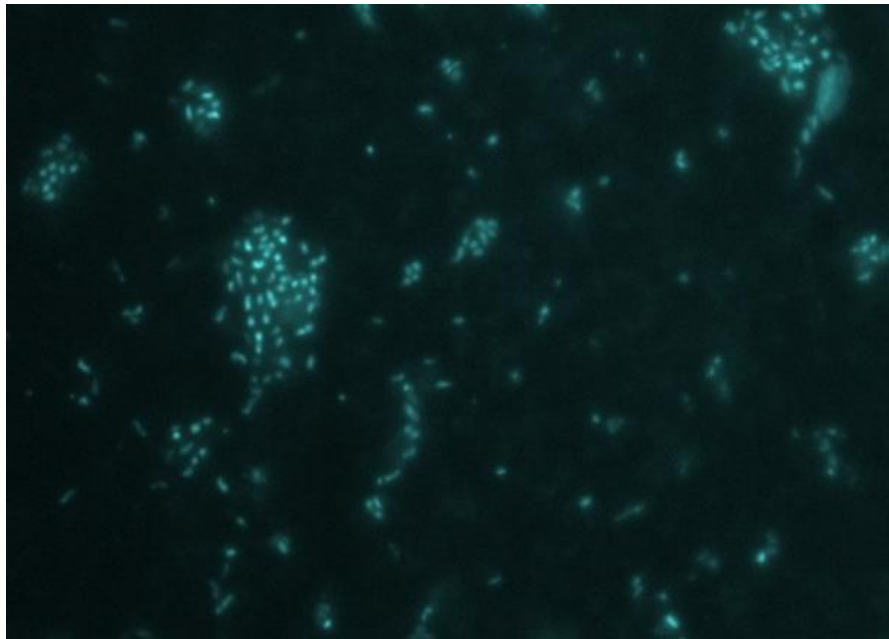

Supplement: Supplementary file [file 24688235]
